# Supplementary material for: Integrative analysis identifies key mRNA biomarkers for diagnosis, prognosis, and therapeutic targets of HCV-associated hepatocellular carcinoma
Source: publisher site journal article supplement (doi:10.18632/aging.202957), 2021-05-04
Supplement: Supplementary file [file aging-v13i9-202957-supplementary-material-SD1.pdf]

SUPPLEMENTARY FIGURES

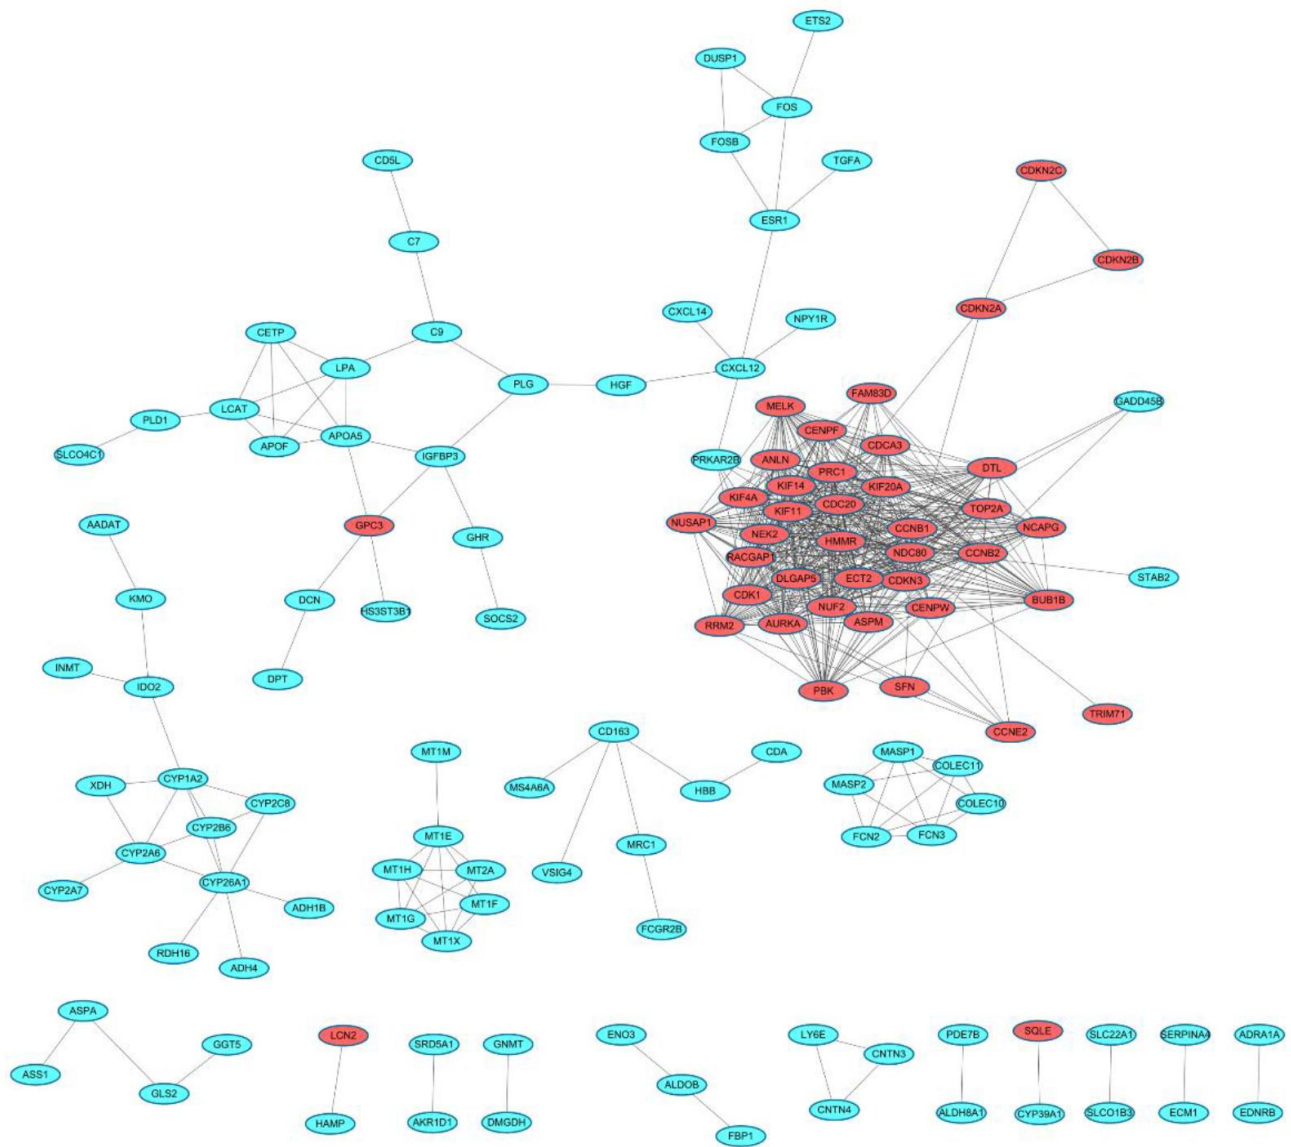

**Supplementary Figure 1. PPI network of 240 DEGs based on the STRING database.** Red nodes denote the upregulated genes, while blue nodes denote the downregulated genes. PPI, protein-protein interaction. DEGs, differentially expressed genes. PPI, protein-protein interaction. STRING, Search Tool for the Retrieval of Interacting Genes.

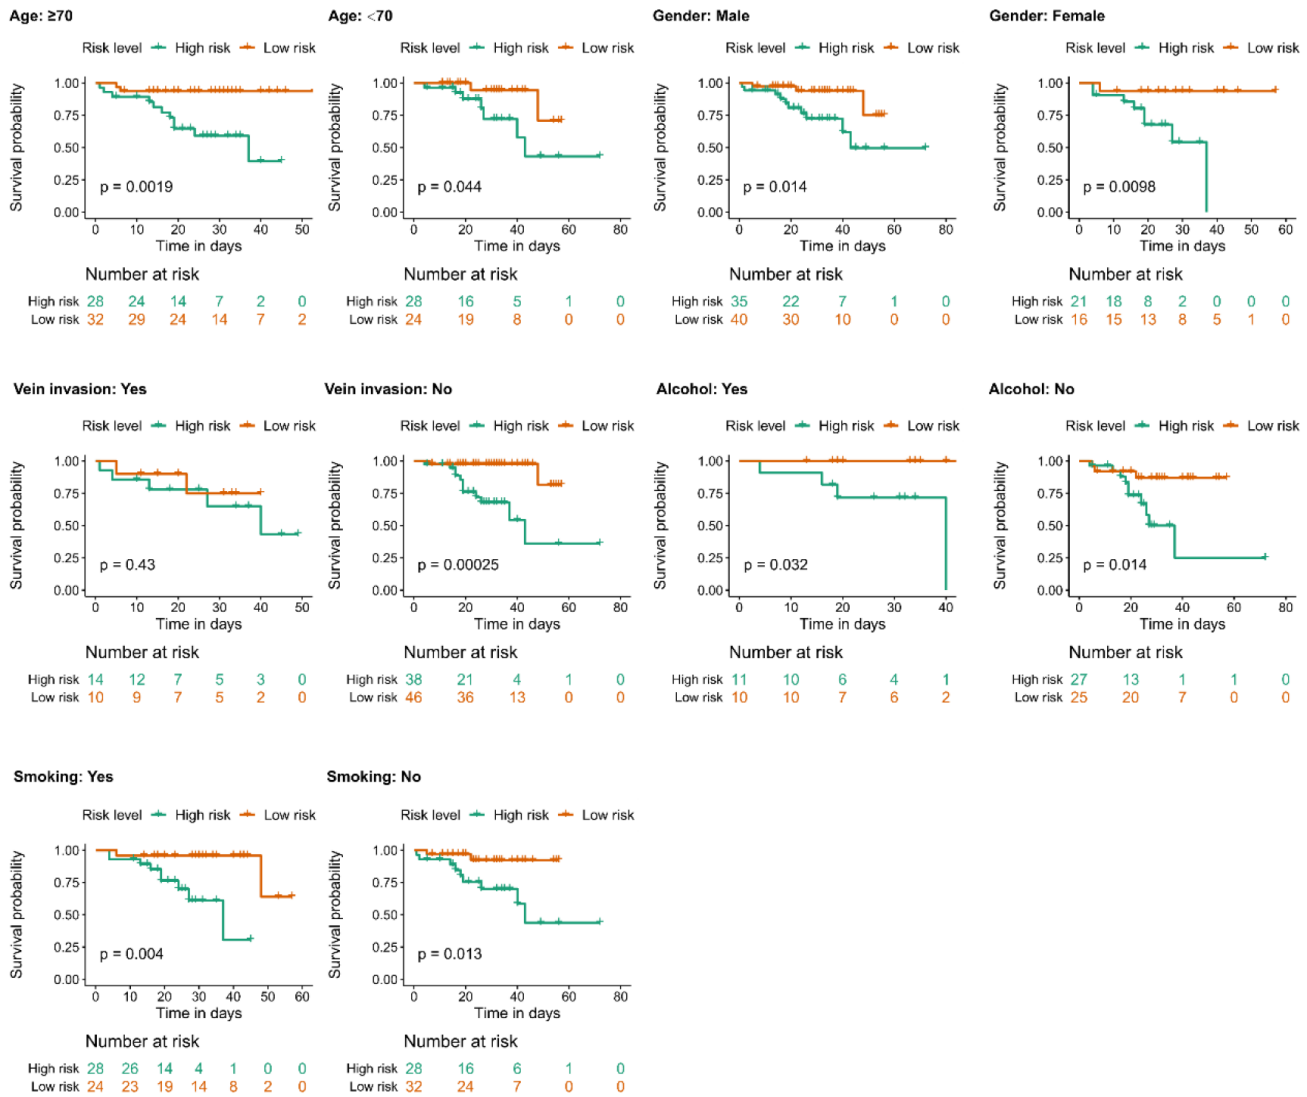

Supplementary Figure 2. Stratified survival analysis according to clinicopathological features.

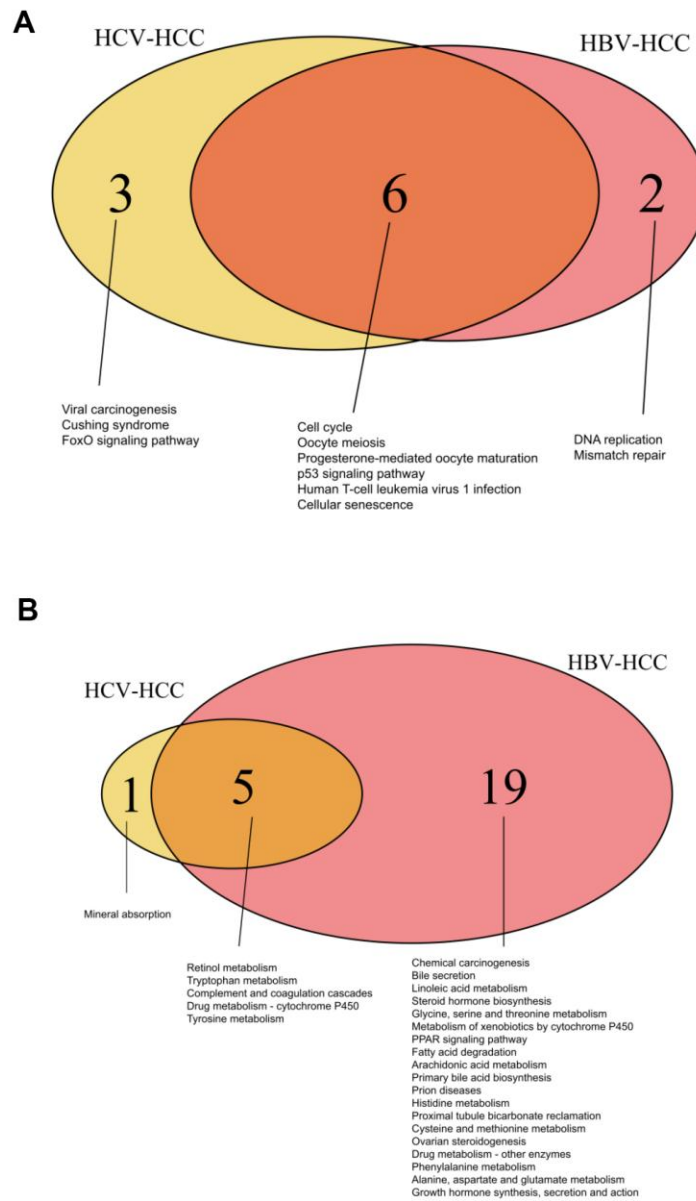

**Supplementary Figure 3. Common KEGG pathways enriched by robust DEGs of HBV-HCC and HCV-HCC.** (A) Venn plot showing the common or individual pathways enriched by the upregulated genes of HCV-HCC and HBV-HCC. (B) Venn plot showing the common or individual pathways enriched by the downregulated genes of HCV-HCC and HBV-HCC. HBV-HCC, HBV - associated HCC. HCV-HCC, HCV-associated HCC. KEGG, Kyoto Encyclopedia of Genes and Genomes. DEGs, differentially expressed genes.
