# Supplementary material for: Integrative analysis identifies key mRNA biomarkers for diagnosis, prognosis, and therapeutic targets of HCV-associated hepatocellular carcinoma
Source: publisher site journal article supplement (doi:10.18632/aging.202957), 2021-05-04
Supplement: Supplementary file [file aging-v13i9-202957-supplementary-material-SD5.pdf]

**Supplementary Table 4. Putative upstream regulatory transcription factors of the hub genes.**

| <b>ID</b> | <b>Accession</b> | <b>Target</b> | <b>TargetID</b> | <b>Experiment</b> | <b>Literature</b> | <b>Tissue</b>  |
|-----------|------------------|---------------|-----------------|-------------------|-------------------|----------------|
| ATF1      | 466              | TOP2A         | 7153            | Unknown           | 12104051          | Not Applicable |
| BRCA1     | 672              | ASPM          | 259266          | +                 | 16123590          | Not Applicable |
| BRCA1     | 672              | CCNB1         | 891             | Unknown           | 12647291          | Not Applicable |
| CUX1      | 1523             | RACGAP1       | 29127           | Unknown           | 21886810          | Not Applicable |
| E2F1      | 1869             | AURKA         | 6790            | +                 | 20300951          | Not Applicable |
| E2F1      | 1869             | CCNB1         | 891             | Unknown           | 22508987          | Not Applicable |
| E2F1      | 1869             | RACGAP1       | 29127           | Unknown           | 21886810          | Not Applicable |
| E2F1      | 1869             | TOP2A         | 7153            | +                 | 11313881          | Not Applicable |
| E2F3      | 1871             | AURKA         | 6790            | +                 | 18776222          | Not Applicable |
| E2F3      | 1871             | CCNB1         | 891             | Unknown           | 17098936          | Not Applicable |
| E2F4      | 1874             | CCNB1         | 891             | Unknown           | 22508987          | Not Applicable |
| FOXJ1     | 2302             | ASPM          | 259266          | Unknown           | 16809635          | Not Applicable |
| FOXM1     | 2305             | CCNB1         | 891             | +                 | 19276163          | Not Applicable |
| IRF1      | 3659             | CCNB1         | 891             | -                 | 22200613          | Not Applicable |
| KLF4      | 9314             | CCNB1         | 891             | -                 | 14627709          | Not Applicable |
| KLF5      | 688              | CCNB1         | 891             | +                 | 21951574          | Not Applicable |
| MED1      | 5469             | AURKA         | 6790            | +                 | 16574658          | Not Applicable |
| MYC       | 4609             | CCNB1         | 891             | Unknown           | 11522645          | Not Applicable |
| NFKB1     | 4790             | CCNB1         | 891             | +                 | 11861406          | Not Applicable |
| NFKB1     | 4790             | CCNB1         | 891             | Unknown           | 19610058          | Not Applicable |
| OTX2      | 5015             | AURKA         | 6790            | +                 | 21047732          | Not Applicable |
| PTTG1     | 9232             | CCNB1         | 891             | +                 | 22475756          | Not Applicable |
| RELA      | 5970             | CCNB1         | 891             | +                 | 11861406          | Not Applicable |
| RELA      | 5970             | CCNB1         | 891             | Unknown           | 19610058          | Not Applicable |
| TBP       | 6908             | CCNB1         | 891             | Unknown           | 17098936          | Not Applicable |
| TFAP2A    | 7020             | CCNB1         | 891             | Unknown           | 7739559           | Not Applicable |
| TP53      | 7157             | CCNB1         | 891             | -                 | 11892838          | Not Applicable |
| TP53      | 7157             | PRC1          | 9055            | -                 | 12889596          | Not Applicable |
| UHRF1     | 29128            | TOP2A         | 7153            | Unknown           | 10646863          | Not Applicable |
| USF1      | 7391             | CCNB1         | 891             | Unknown           | 10548544          | Not Applicable |
| YBX1      | 4904             | CCNB1         | 891             | -                 | 20596676          | Not Applicable |
| YBX1      | 4904             | CDKN3         | 1033            | +                 | 20596676          | Not Applicable |
| YBX1      | 4904             | TOP2A         | 7153            | Unknown           | 10597187          | Not Applicable |
